# Supplementary material
Source: PubMed Central journal article supplement (PMC5510918)
Supplement: mmc1.pdf [file mmc1.pdf]

**Biophysical Journal, Volume 113**

**Supplemental Information**

**Charged Antimicrobial Peptides Can Translocate across Membranes  
without Forming Channel-like Pores**

**Jakob P. Ulmschneider**

## Supplementary information

Figure S1

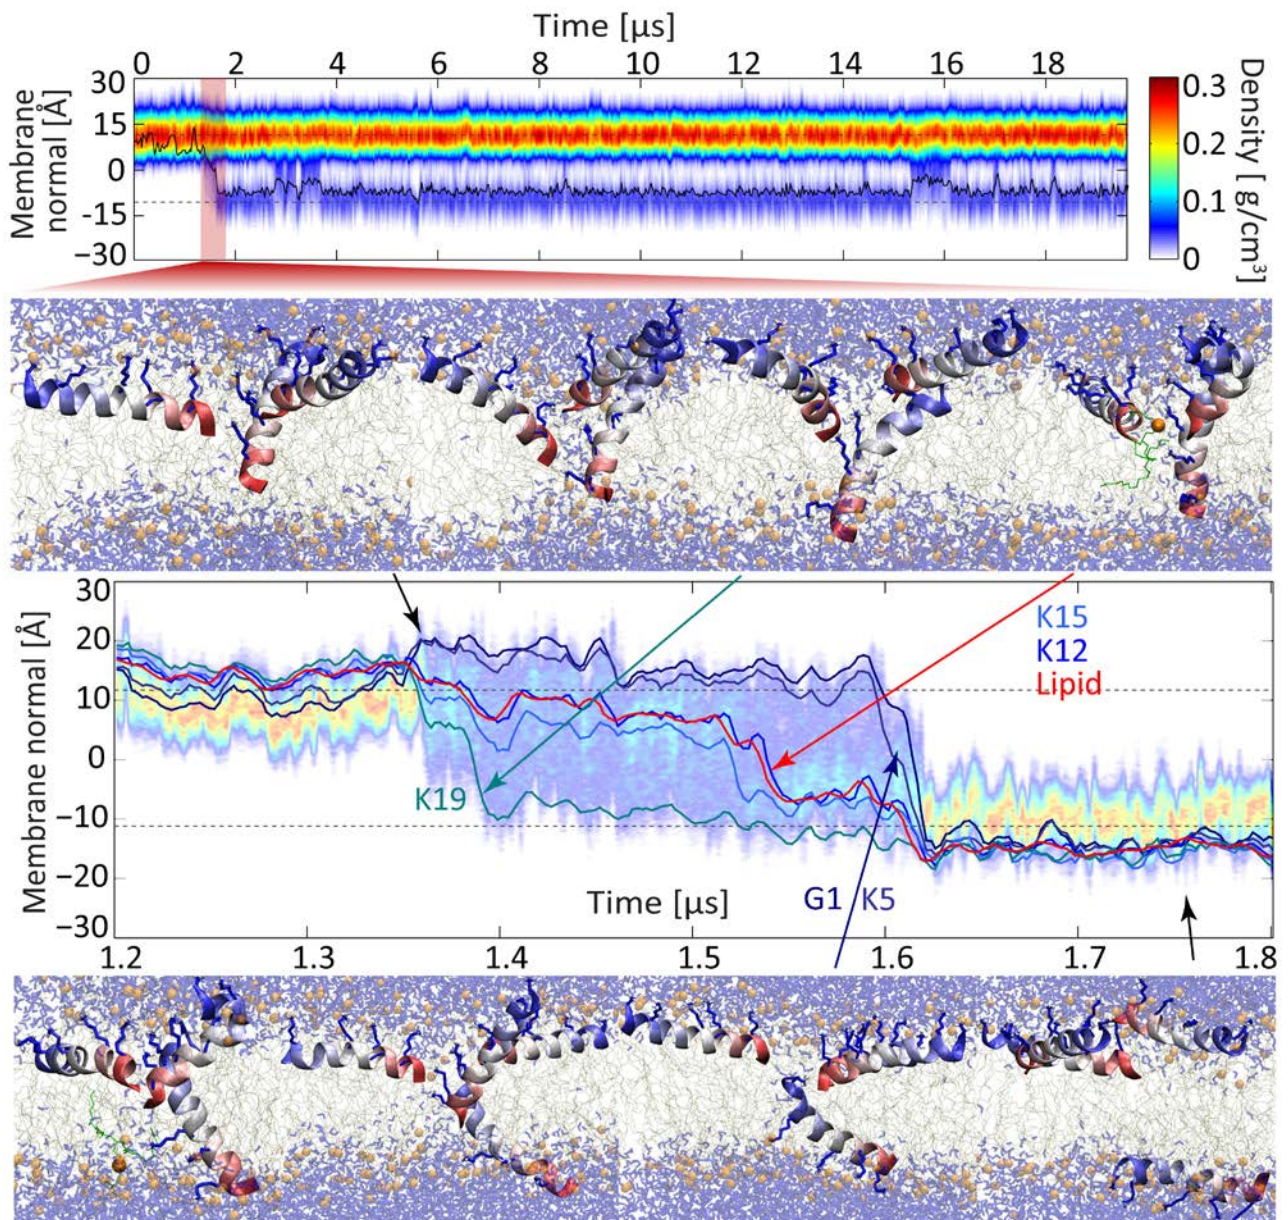

**Figure S1.** Example of a rapid C-terminal-first peptide translocation involving a short-lived water pore, as observed for a 20  $\mu\text{s}$  simulation in a pure DMPC bilayer. The total peptide mass density is shown in the upper panel, with the transition shown in more detail in the lower panel. The mechanism is identical to the other C-terminal transitions observed, with the only change being the slightly longer translocation time (200 ns). Again, a lipid is co-translocated (flip-flop), facilitating the translocation of K12 and K15.
